# Supplementary material for: Effects of supplementary feeding on the rumen morphology and bacterial diversity in lambs
Source: PeerJ. 2020 Jun 19;8:e9353. doi: 10.7717/peerj.9353 (PMC7307561; doi:10.7717/peerj.9353)
Supplement: Supplemental Information 1 [file peerj-08-9353-s001.xlsx]

## Sheet: Sheet2
Supplemental Table S1 Phenotypic variables in Hu lambs of the two groups
Group	Number	Rumen papillae length(μm)	Rumen papillae width(μm)	Rumen papillae tunica muscularis thickness(μm)	NH3-N content（mg/100mL）	Acetate(mmol/L)	Propionate(mmol/L)	Butyrate(mmol/L)	A/P	TVFA(mmol/L)	pH
C groups	W7	468.833	322.033	1063.22	4.83678	6.25492	6.08	0.749988	1.03	26.2	5.15
	W8	337.117	186.217	890.317	28.6228	24.7649	4.92885	0.828747	5.02529	31.8496	5.31
	W9	326.433	293.35	648.817	32.122	12.8202	8.71875	1.08028	1.47109	25.4658	5.73
	W10	349.047	250.98	931.068	21.0512	23.2156	5.97853	1.01	3.93609	33.5516	5.63
	W11	376.428	232.957	918.687	33.3284	25.7498	6.87331	0.66093	3.74524	34.8718	6.09
	W12	243.335	193.955	872.085	26.1648	17.7824	3.92174	1.73795	4.52582	24.4374	5.35
S groups	W13	422.473	195.322	753.178	18.6383	56.5518	24.1151	18.3453	2.34357	103.299	5.56
	W14	571.903	257.753	706.148	29.2936	59.5444	19.0772	16.773	3.12093	95.3697	5.26
	W15	488.522	253.142	856.077	9.73264	87.1457	22.649	12.8308	3.84597	125.652	6.14
	W16	488.11	228.457	916.583	42.0289	42.4633	17.4572	7.49199	2.43274	72.2325	5.07
	W17	584.653	167.173	2073.47	27.8	60.89	20.8	11.35	2.93	99.5	5.68
	W18	683.505	229.813	1186.46	38.795	61.1	20.5	11.4	2.98	99.15	5.55
Numbering refers to the self-numbering of the sheep at the time of slaughter
